# Supplementary material for: Enhanced microglial dynamics and paucity of tau seeding in the amyloid plaque microenvironment contributes to cognitive resilience in Alzheimer’s disease
Source: PubMed Central journal article supplement — bioRxiv. 2023 Jul 28:2023.07.27.550884. Preprint. [Version 1] doi: 10.1101/2023.07.27.550884 (PMC10402121; doi:10.1101/2023.07.27.550884), 2023-07-28
Supplement: NIHPP2023.07.27.550884v1-supplement-1.pdf [file NIHPP2023.07.27.550884v1-supplement-1.pdf]

858 **SUPPLEMENTAL FIGURES LEGENDS**

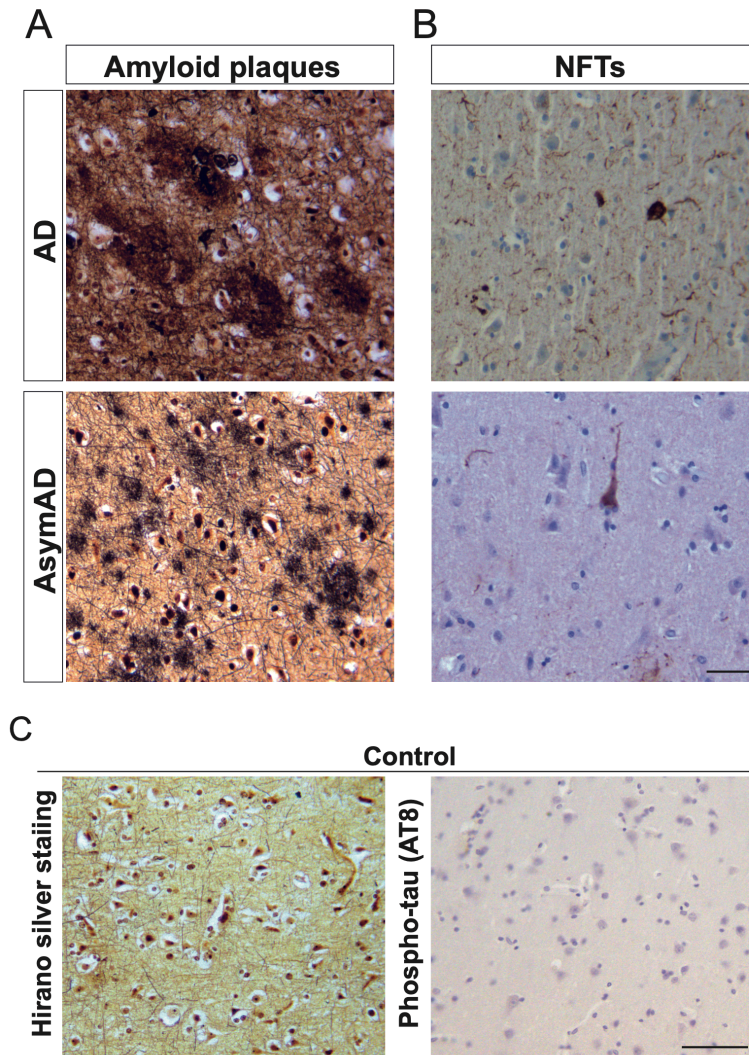

859

860

861 **Supplementary Figure 1: Middle frontal gyrus autopsies in non-demented subjects with high**

862 **loads of Alzheimer's disease pathology. A-B** Histopathology performed in AD and AsymAD

863 cases confirmed the presence of amyloid plaques by Hirano silver staining (A) and neurofibrillary

864 tangles (NFTs) by AT8 (B), an antibody which recognizes the pathological phospho-sites in

865 Ser202/Thr305 of tau protein. Representative images showing cases with a CERAD between B-C

866 and a Braak and Braak score of 4-6. Scale bar: 20  $\mu$ m. C. No reactivity for none of these

867 pathological markers was found in age-matched control subjects. Scale bar: 50  $\mu$ m.

868

869

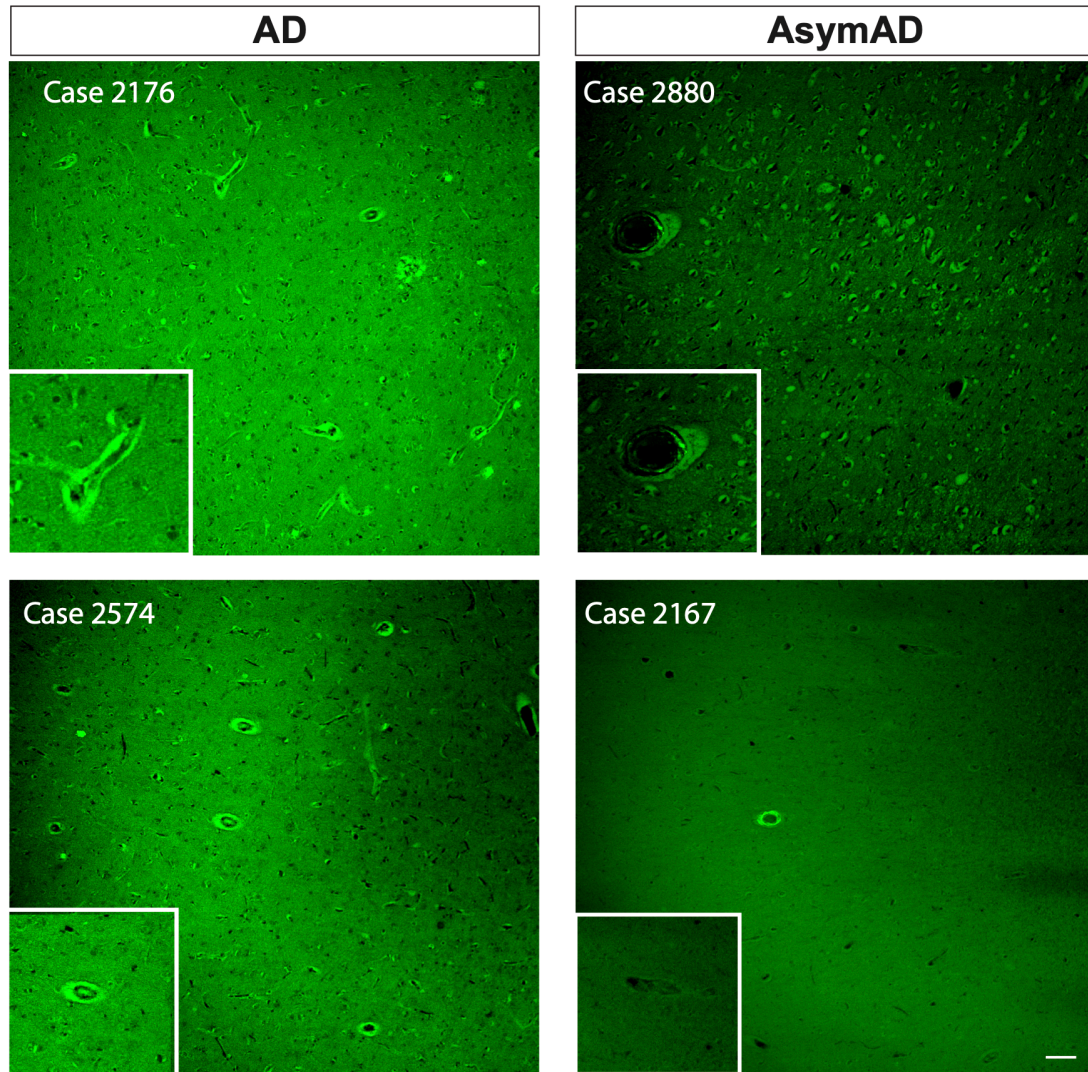

870

871 **Supplementary Figure 2:** Detection of vascular amyloid aggregation using Thioflavin S in AD

872 and AsymAD cases. The insets show structures recognized as vasculature in the MFG of AD and

873 AsymAD cases. Scale bar: 50  $\mu$ m.

874

875

876

877

878

879

880

881

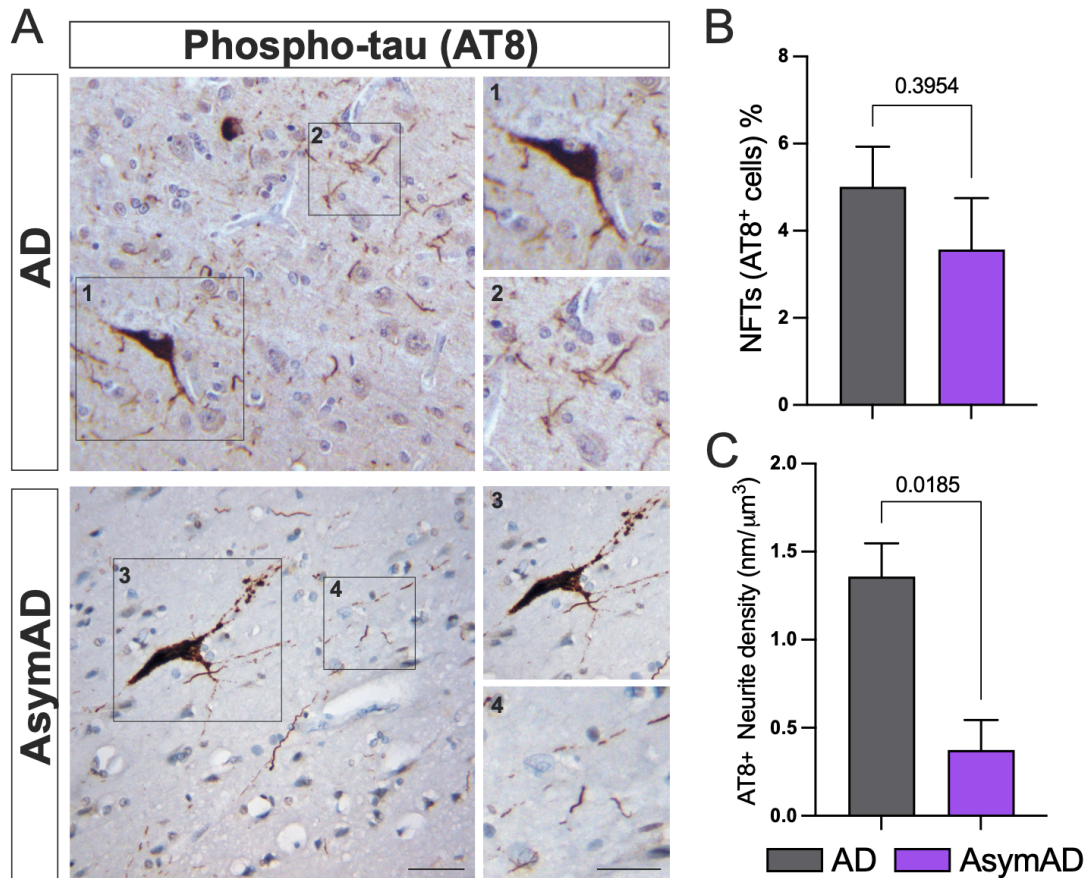

882

883

884 **Supplementary Figure 3: AsymAD cases show similar numbers of NFTs compared to AD,**

885 **but reduced AT8 positive (AT8<sup>+</sup>) neuritic staining. A. phospho-tau staining in AD and AsymAD**

886 **subjects. Both representative figures were cases classified as CERAD C and Braak and Braak score**

887 **of 6. Scale bar: 20 μm and 10 μm (insets) B. Quantification of AT8<sup>+</sup> neurites and C. percentage of**

888 **NFTs/AT8<sup>+</sup> cell. Data is shown as mean ± SEM, Mann-Whitney test, n=4-6 per condition.**

889

890

891

892

893

894

895

896

897

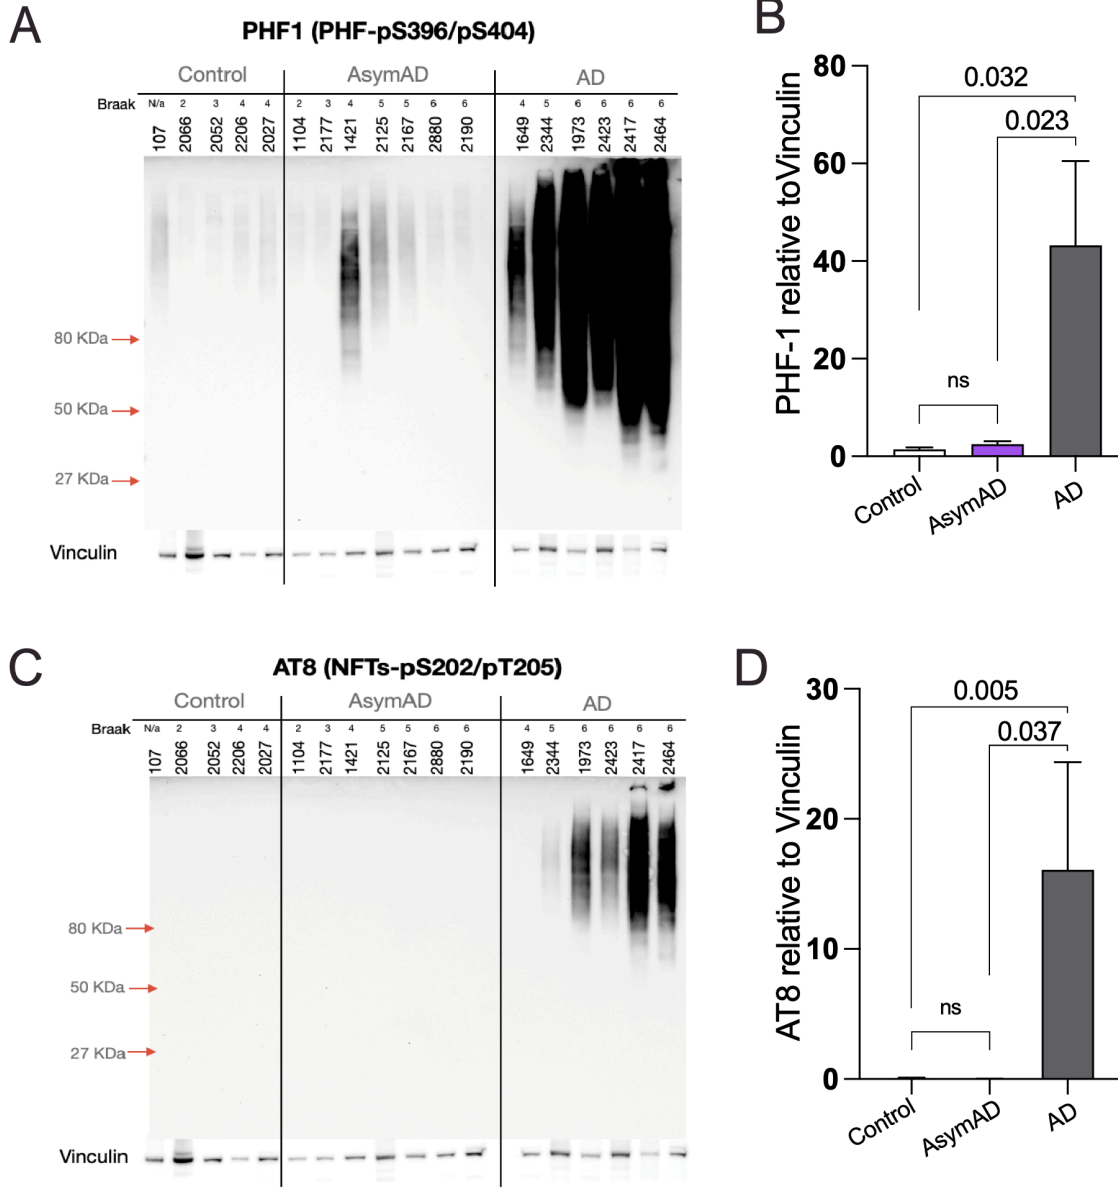

898

899

900 **Supplementary Figure 4: Tau species in total soluble and insoluble extracts of AD, AsymAD**

901 **and aged-matched controls. A-B.** Western blot against specific PHF1 (pTauS396/S404) (A) and

902 AT8 (pTauS202/Thr305) (C) and its respective quantifications (B-D).

903

904

905

906

907

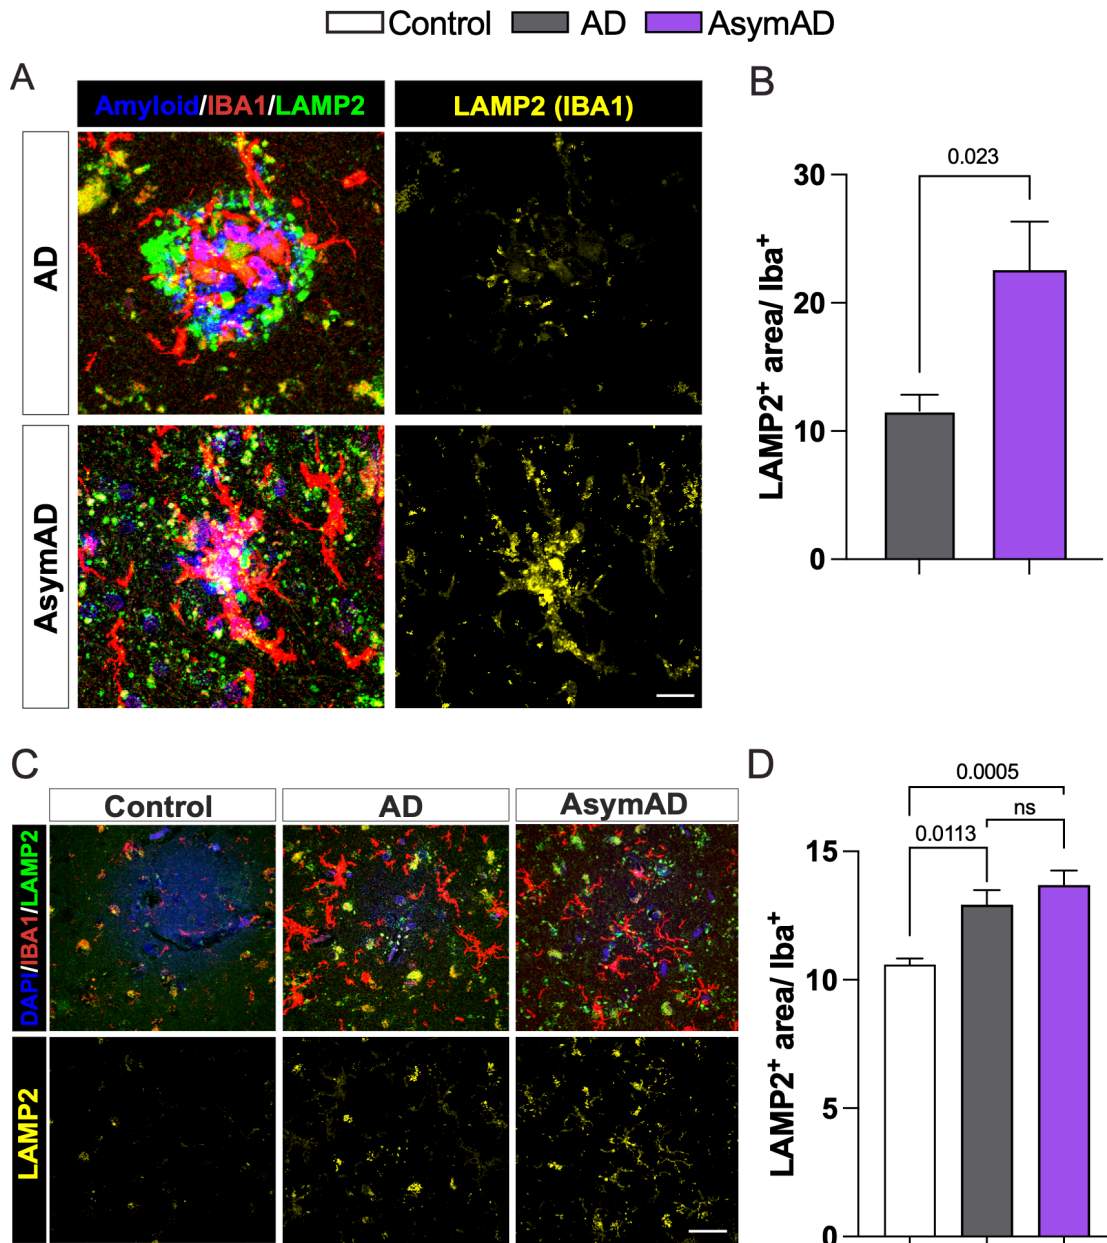

908

909 **Supplementary Figure 5: Increased LAMP2 levels in plaque-AsymAD microenvironment.**

910 **A.** Staining against LAMP2 (green), IBA1 (red) and DAPI, to identify amyloid-plaques and cell  
911 nuclei in AsymAD and AD cases **B.** Quantification of LAMP2 positive area within IBA1 area **C.**  
912 LAMP2 and IBA1 immunostaining in areas free of amyloid plaques in control, AD and AsymAD  
913 cases **D.** quantification of LAMP2 immunoreactivity in IBA1+ area. Data is shown as mean ±  
914 SEM. In B,  $n=6$  cases, per condition and 22-28 plaques were analyzed. Significance was

915 determined by Mann-Whitney test. In F,  $n=6$  cases, per condition were analyzed. Data is shown  
916 as  $\pm SEM$ , One-way ANOVA and Tukey's multiple comparisons test (n.s.; 0.5432)
